# Supplementary material
Source: Springer Nature journal article supplement (https://www.springermedizin.de/resource/supplementary/12889_2014_7399_MOESM2_ESM.pdf/9497330)
Supplement: MOESM2 [file 9497330]

**Invitation to Queensland KYN pharmacies**  
Expression of interest sent to permanent pharmacies (year-long KYN Program) only  
N=252

Pharmacies agreed to participate and  
**Randomly allocated into 2 groups N=119 (47%)\***

Pharmacies: **withdrew**  
N=2

Pharmacies: **swapped groups:**  
(Group 1 to Group 2 N=3)  
(Group 2 to Group 1 N=7)

**PHARMACIES** who participated in the KYN pilot Program  
N=117

**Group 1**  
BP/AUSDRISK/RBGT  
n=58

**Group 2**  
BP/AUSDRISK  
n=59

**PARTICIPANTS** who registered in the KYN pilot Program N=5,483  
All ages (from 18 years or more) were eligible  
Participants did not have to complete a BP check.

**Group 1**  
BP/AUSDRISK/RBGT  
n=3,494

**Group 2**  
BP/AUSDRISK  
n=1,989

**RBGT**  
1,131 refused  
747 unknown  
282 ineligible\*\*  
46 invalid values

**AUSDRISK**  
1,102 refused  
747 unknown  
282 ineligible\*\*  
16 invalid values

**AUSDRISK**  
932 refused  
171 unknown  
248 ineligible\*\*  
16 invalid values

**BP tested**  
3,398 (97%)

**RBGT undertake**  
1,288 (37%)

**AUSDRISK completed**  
1,347 (39%)

**BP tested**  
1,948 (98%)

**AUSDRISK completed**  
622 (31%)

**RBGT & AUSDRISK**  
1,121 (32%)
